# Supplementary material for: Safety of Hepatitis B Vaccines (Monovalent or as Part of Combination) in Preterm Infants: A Systematic Review
Source: MDPI journal article supplement (doi:10.3390/vaccines12030261), 2024-03-01
Supplement: s1 [file s1]

**Table S1.** Search strategy applied to (A) MEDLINE via Ovid 1946 to March 30, 2023; (B) Embase via Ovid 1947 to March 30, 2023; (C) Cochrane Central Register of Controlled Trials via March 30, 2023 (D) CINAHL Plus March 30, 2023.

**(A)**

| #  | Query                                                                                                     |
|----|-----------------------------------------------------------------------------------------------------------|
| 1  | Patient Safety/ or Safety/ or safety.mp.                                                                  |
| 2  | Population Surveillance/ or surveillance.mp.                                                              |
| 3  | Complication.mp.                                                                                          |
| 4  | Adverse event.mp.                                                                                         |
| 5  | Response.mp.                                                                                              |
| 6  | Deterioration.mp. or Clinical Deterioration/                                                              |
| 7  | 1 or 2 or 3 or 4 or 5 or 6                                                                                |
| 8  | Viral Vaccines/ or vaccin*.mp. or Vaccination/ or Vaccines/                                               |
| 9  | Immunis*.mp.                                                                                              |
| 10 | Immunization/ or immuniz*.mp. or Immunization Programs/                                                   |
| 11 | Inoculat*.mp.                                                                                             |
| 12 | Infant, Premature/ or Premature Birth/ or preterm.mp.                                                     |
| 13 | Prematur*.mp.                                                                                             |
| 14 | 8 or 9 or 10 or 11                                                                                        |
| 15 | 12 or 13                                                                                                  |
| 16 | Infant.mp. or Infant, Newborn/ or Infant/ or Infant, Premature, Diseases/ or Infant, Extremely Premature/ |

|    |                            |
|----|----------------------------|
|    |                            |
| 17 | Neonat*.mp. or Neonatology |
| 18 | Baby.mp.                   |
| 19 | Babies.mp.                 |
| 20 | 16 or 17 or 18 or 19       |
| 21 | 7 and 14 and 15 and 20     |
| 22 | Limit 21 to last 20 years  |

**(B)**

| #  | Query                                                                       |
|----|-----------------------------------------------------------------------------|
| 1  | Patient Safety/ or Safety/ or safety.mp.                                    |
| 2  | Surveillance.mp. or monitoring                                              |
| 3  | Complication/ or complication.mp.                                           |
| 4  | Controlled study/ or adverse event.mp. or adverse event/ or clinical trial/ |
| 5  | Response.mp. or cardiovascular response/                                    |
| 6  | Deterioration.mp. or deterioration/                                         |
| 7  | 1 or 2 or 3 or 4 or 5 or 6                                                  |
| 8  | Vaccination/ or vaccin*.mp. or vaccine/                                     |
| 9  | Virus vaccine/ or immunis*.mp.                                              |
| 10 | Immunization/ or immuniz*.mp.                                               |
|    |                                                                             |

|    |                                                                            |
|----|----------------------------------------------------------------------------|
| 11 | Inoculation/ or inoculat*.mp.                                              |
| 12 | 8 or 9 or 10 or 11                                                         |
| 13 | Prematurity/ or preterm.mp.                                                |
| 14 | Prematur*.mp.                                                              |
| 15 | 13 or 14                                                                   |
| 16 | Infant disease/ or high risk infant/ or infant.mp. or hospitalized infant/ |
| 17 | Neonatology/ or newborn/ or neonatal intensive care unit/ or neonat*.mp.   |
| 18 | Baby.mp. or baby/                                                          |
| 19 | Babies.mp.                                                                 |
| 20 | 16 or 17 or 18 or 19                                                       |
| 21 | 7 and 12 and 15 and 20                                                     |
| 22 | Limit 21 to last 20 years                                                  |

**(C)**

| # | Query                                     |
|---|-------------------------------------------|
| 1 | Patient Safety/ or Safety/ or safety.mp.  |
| 2 | Surveillance.mp.                          |
| 3 | Complication.mp.                          |
| 4 | Adverse event.mp.                         |
| 5 | Generalization, response/ or response.mp. |

|    |                                                                                                                                                           |
|----|-----------------------------------------------------------------------------------------------------------------------------------------------------------|
| 6  | Deterioration.mp. or Clinical Deterioration/                                                                                                              |
| 7  | 1 or 2 or 3 or 4 or 5 or 6                                                                                                                                |
| 8  | Vaccin*.mp.                                                                                                                                               |
| 9  | Immunis*.mp.                                                                                                                                              |
| 10 | Immunization/ or immuniz*.mp.                                                                                                                             |
| 11 | Inoculat*.mp.                                                                                                                                             |
| 12 | 8 or 9 or 10 or 11                                                                                                                                        |
| 13 | Preterm.mp. or Infant, Premature/                                                                                                                         |
| 14 | Premature Birth/ or prematur*.mp.                                                                                                                         |
| 15 | 13 or 14                                                                                                                                                  |
| 16 | Infant, Extremely Premature/ or infant Health/ or infant.mp. or Infant/ or Infant, Newborn/ or Infant, Newborn, Diseases/ or Infant, Premature, Diseases/ |
| 17 | Neonat*.mp.                                                                                                                                               |
| 18 | Baby.mp.                                                                                                                                                  |
| 19 | Babies.mp.                                                                                                                                                |
| 20 | 16 or 17 or 18 or 19                                                                                                                                      |
| 21 | 7 and 12 and 15 and 20                                                                                                                                    |
| 22 | Limit 21 to last 20 years                                                                                                                                 |

**(D)**

| #  | Query                            |
|----|----------------------------------|
| 1  | Safety                           |
| 2  | Surveillance                     |
| 3  | Complication                     |
| 4  | Adverse event                    |
| 5  | Response                         |
| 6  | Deterioration                    |
| 7  | S1 or S2 or S3 or S4 or S5 or S6 |
| 8  | Vaccin*                          |
| 9  | Immunis*                         |
| 10 | Immuniz*                         |
| 11 | Inoculat*                        |
| 12 | S8 or S9 or S10 or S11           |
| 13 | Preterm                          |
| 14 | Prematur*                        |
| 15 | 13 or 14                         |
| 16 | Infant                           |
| 17 | Neonat*                          |
|    |                                  |

|    |                                                      |
|----|------------------------------------------------------|
| 18 | Newborn                                              |
| 19 | Baby                                                 |
| 20 | Babies                                               |
| 21 | S16 or S17 or S18 or S19 or S20                      |
| 22 | S7 and S12 and S15 and S21                           |
| 23 | Limit S22 by Publish date (2003/03/01 to 2023/03/31) |

**Figure S1.** Risk of bias assessment of included clinical studies using. Abbreviations used: +, low risk of bias; ?, unclear risk of bias; -, moderate risk of bias.

|                       | Bias due to confounding | Bias in selection of participants into the study | Bias in classification of interventions | Bias due to deviation from intended interventions | Bias due to missing data | Bias in measurement of outcomes | Bias in selection of the reported results |
|-----------------------|-------------------------|--------------------------------------------------|-----------------------------------------|---------------------------------------------------|--------------------------|---------------------------------|-------------------------------------------|
| Anderson et al 2013   | +                       | -                                                | ?                                       | +                                                 | ?                        | -                               | +                                         |
| Bhave et al 2002      | +                       | +                                                | ?                                       | +                                                 | -                        | +                               | +                                         |
| Bohnhorst et al 2021  | +                       | +                                                | +                                       | +                                                 | +                        | -                               | ?                                         |
| Clifford et al 2011   | +                       | +                                                | +                                       | +                                                 | +                        | -                               | +                                         |
| Cooper et al 2008     | +                       | +                                                | +                                       | +                                                 | ?                        | +                               | +                                         |
| Ellison et al 2005    | +                       | ?                                                | ?                                       | +                                                 | ?                        | +                               | +                                         |
| Faldella et al 2007   | ?                       | ?                                                | +                                       | ?                                                 | ?                        | -                               | +                                         |
| Fortmann et al 2021   | +                       | +                                                | +                                       | ?                                                 | +                        | -                               | +                                         |
| Furck et al 2010      | ?                       | +                                                | +                                       | +                                                 | ?                        | -                               | +                                         |
| Hacking et al 2010    | ?                       | ?                                                | ?                                       | +                                                 | +                        | -                               | +                                         |
| Jin et al 2021        | ?                       | ?                                                | ?                                       | ?                                                 | ?                        | -                               | +                                         |
| Lao et al 2022        | ?                       | +                                                | +                                       | ?                                                 | +                        | -                               | ?                                         |
| Martinelle et al 2020 | +                       | ?                                                | ?                                       | ?                                                 | ?                        | -                               | ?                                         |
| Montage et al 2016    | ?                       | -                                                | ?                                       | ?                                                 | +                        | -                               | +                                         |
| Omenaca et al 2005    | ?                       | +                                                | +                                       | +                                                 | ?                        | -                               | +                                         |
| Pop et al 2023        | ?                       | ?                                                | ?                                       | +                                                 | ?                        | -                               | ?                                         |
| Pourcyrous et al 2007 | +                       | +                                                | +                                       | +                                                 | +                        | -                               | +                                         |
| Schulzke et al 2005   | ?                       | +                                                | +                                       | +                                                 | ?                        | -                               | +                                         |
| Vazquez et al 2008    | ?                       | +                                                | +                                       | +                                                 | ?                        | -                               | +                                         |
| Wilck et al 2021      | +                       | +                                                | +                                       | +                                                 | +                        | +                               | +                                         |
| Xu et al 2020         | ?                       | ?                                                | ?                                       | +                                                 | ?                        | -                               | ?                                         |
